# Supplementary figures and images for: Transcutaneous bilirubinometry during and after phototherapy in preterm infants: a prospective observational study
Source: PubMed Central journal article supplement — BMJ Paediatr Open. 2020 Jul 16;4(1):e000681. doi: 10.1136/bmjpo-2020-000681 (PMC7368502; doi:10.1136/bmjpo-2020-000681), 2020-07-16

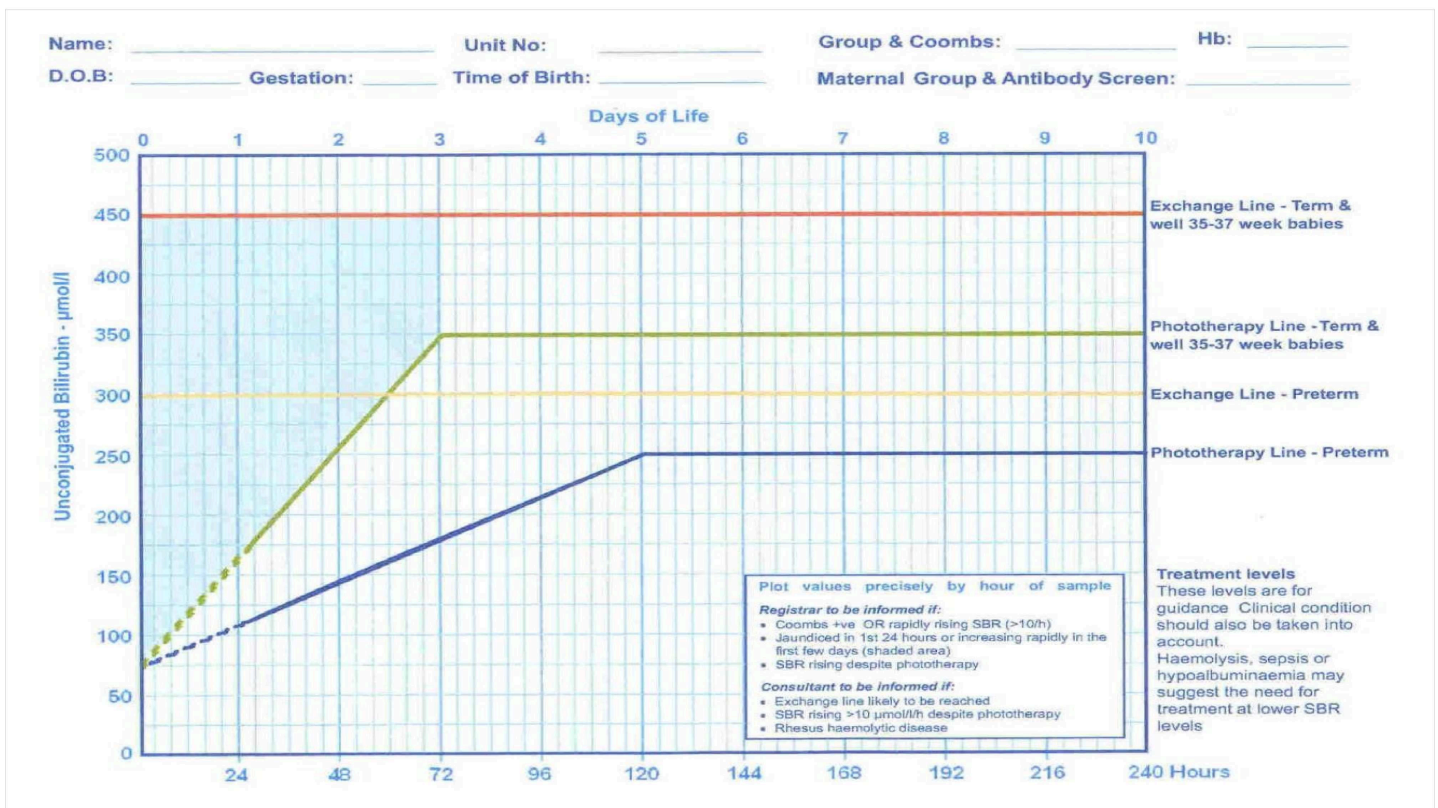

Supplement: bmjpo-2020-000681supp001.pdf [file bmjpo-2020-000681supp001.pdf]
